# Supplementary material for: Global and target analysis of relaxation processes of the collapsed state of P3HT polymer nanoparticles
Source: Royal Society of Chemistry journal article supplement (doi:10.1039/c9cp06600d), 2019-12-23
Supplement: c9cp06600d1.pdf [file c9cp06600d1.pdf]

## **Electronic Supplementary Information**

### **Global and Target Analysis of Relaxation Processes of Collapsed State of P3HT Polymer Nanoparticles**

Arnab Ghosh, Srijon Ghosh, Goutam Ghosh, Bikash Jana and Amitava Patra\*

School of Materials Sciences, Indian Association for the Cultivation of Science, Jadavpur,  
Kolkata 700032, India

\*Corresponding author's E-mail: [msap@iacs.res.in](mailto:msap@iacs.res.in), Phone: (91)-33-2473-4971, Fax: (91)-33-2473-2805

### Calculation of concentration of Au NP

We have used 500  $\mu\text{l}$  of 10 mM  $\text{HAuCl}_4 \cdot 3\text{H}_2\text{O}$  solution for preparation of Au NPs which corresponds to 1.97 mg  $\text{HAuCl}_4 \cdot 3\text{H}_2\text{O}$  i.e. 0.985 mg Au. We have found that diameter of each Au NP was  $\approx 5$  nm which means the volume of each Au NP is  $\frac{4}{3} \times \Pi \times (5/2 \times 10^{-7})^3 \text{ cm}^3$ . Now, the total volume of the prepared Au NP solution was 20 mL. So, no. of Au NP in 20 mL solution will be, {mass of Au present/ (volume of each particle  $\times$  density of Au)}. Since the density of Au is  $19.32 \text{ g cm}^{-3}$ , total no of Au NP in 20 mL solution is  $\{0.985 \times 10^{-3} / (\frac{4}{3} \times \Pi \times (5/2 \times 10^{-7})^3 \times 19.32)\}$  which is equal to  $7.8 \times 10^{14}$ . So, in 1000 mL there is  $(7.8 \times 10^{14} \times 1000/20) = 3.89 \times 10^{16}$  no. of Au NP. Now, 1 mole corresponds to  $6.023 \times 10^{23}$  no. of particles. Therefore, in 1000 mL stock solution there is  $(3.89 \times 10^{16} / 6.023 \times 10^{23}) = 64 \times 10^{-9}$  moles Au NP. So, the molar concentration of Au NP stock solution is  $64 \times 10^{-9} \text{ M}$  i.e 64 nM. Now, we have added 75, 125 and 250  $\mu\text{l}$  of this stock solution for preparing the composites and the final volume of each set was 3 mL which means final concentration of Au NP in the composite systems are 1.5 nM, 2.5 nM and 5 nM.

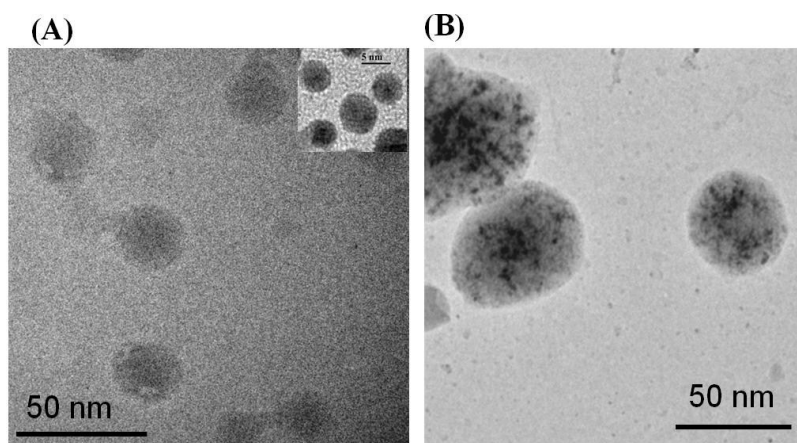

**Fig. S1:** TEM images of (A) P3HT PNP (inset show image of prepared Au NP) and (B) P3HT PNP/Au NP heterostructures

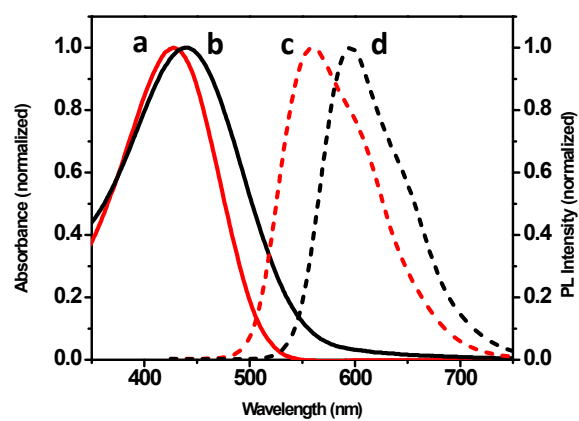

**Fig. S2:** UV-Vis absorption spectra and PL spectra respectively of P3HT in THF (a,c) and P3HT PNP (b,d)

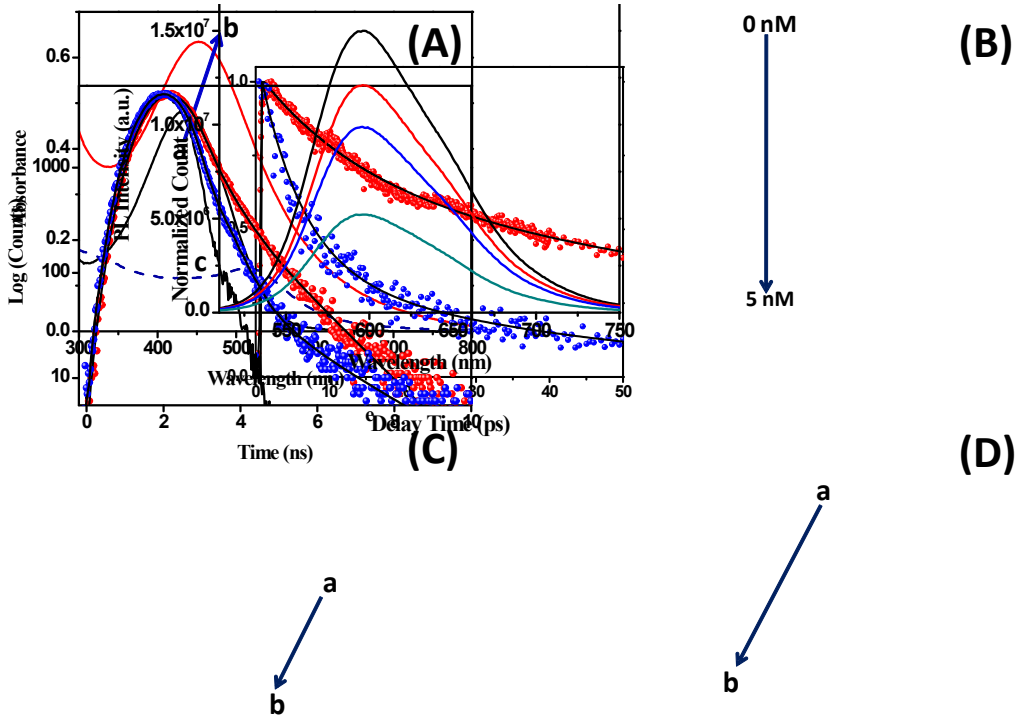

**Fig. S3:** (A) UV-Vis spectra of (a) P3HT PNP, (b) P3HT PNP/Au NP heterostructure and (c) 5 nM Au NP; (B) PL spectra of P3HT PNP and P3HT PNP/Au NP heterostructure with increasing concentration of Au NP from 0 to 5 nM; (C) TCSPC and (D) Fluorescence Upconversion decay curves of (a) P3HT PNP and (b) P3HT PNP/Au NP heterostructure

Time-correlated single photon counting (TCSPC) instrumentation:

The data was analyzed by following equation:

$$P(t) = b + \sum_i^n \alpha_i \exp\left(-\frac{t}{\tau_i}\right)$$

Here,  $n$  is the number of emissive species,  $b$  is the baseline correction (“DC” offset), and  $\alpha_i$  and  $\tau_i$  are the pre-exponential factor and the excited-state fluorescence decay time associated with the  $i^{th}$  component. The average decay time,  $\langle \tau \rangle$ , was calculated from the following equation.

$$\langle \tau \rangle = \sum_{i=1}^n \beta_i \tau_i$$

Where  $\beta_i = \alpha_i / \sum \alpha_i$  and it is the contribution of the decay component.  $\alpha_i$  and  $\tau_i$  are the pre-exponential factors and excited-state fluorescence lifetimes associated with the  $i^{th}$  component, respectively. This value should be called an amplitude-weighted lifetime.

**Table S1:** TCSPC decay fitting parameters of P3HT PNP and P3HT PNP/Au NP heterostructure

| Sample                     | $\tau_1$ ( $a_1$ ) (ns) | $\tau_2$ ( $a_2$ ) (ns) | $\tau_3$ ( $a_3$ ) (ns) | $\tau_{avg.}$ (ns) |
|----------------------------|-------------------------|-------------------------|-------------------------|--------------------|
| P3HT PNP                   | 0.335 (0.93)            | 1.1 (0.07)              | -                       | 0.388              |
| P3HT/Au NP Heterostructure | 0.23 (0.83)             | 0.597 (0.15)            | 1.2 (0.02)              | 0.304              |

**Table S2:** Fluorescence upconversion decay fitting parameters of P3HT PNP and P3HT PNP/Au NP heterostructure

| Sample                     | $\tau_1$ ( $a_1$ ) ps | $\tau_2$ ( $a_2$ ) ps |
|----------------------------|-----------------------|-----------------------|
| P3HT PNP                   | 15 (0.31)             | 380 (0.69)            |
| P3HT/Au NP Heterostructure | 8 (0.73)              | 275 (0.27)            |

**Table S3:** Fitting parameters of bleach recovery kinetics of P3HT PNP and P3HT PNP/Au NP heterostructure obtained from TAS

| Sample                     | $\tau_1^g$ ( $a_1$ ) (fs) | $\tau_1^r$ ( $a_2$ ) (ps) | $\tau_2^r$ ( $a_3$ ) (ps) | $\tau_3^r$ ( $a_3$ ) (ps) | $\tau_4^r$ ( $a_4$ ) (ps) |
|----------------------------|---------------------------|---------------------------|---------------------------|---------------------------|---------------------------|
| P3HT in THF                | <100 (100%)               | 2.4 (48%)                 | 490 (37%)                 |                           | >8000 (15%)               |
| P3HT in PNP                | <100 (100%)               | 0.554 (56%)               | 4.73 (20%)                | 445 (14%)                 | >8000 (10%)               |
| P3HT/Au NP Heterostructure | <100 (100%)               | 0.2 (70%)                 | 3.2 (12%)                 | 295 (10%)                 | >8000 (8%)                |

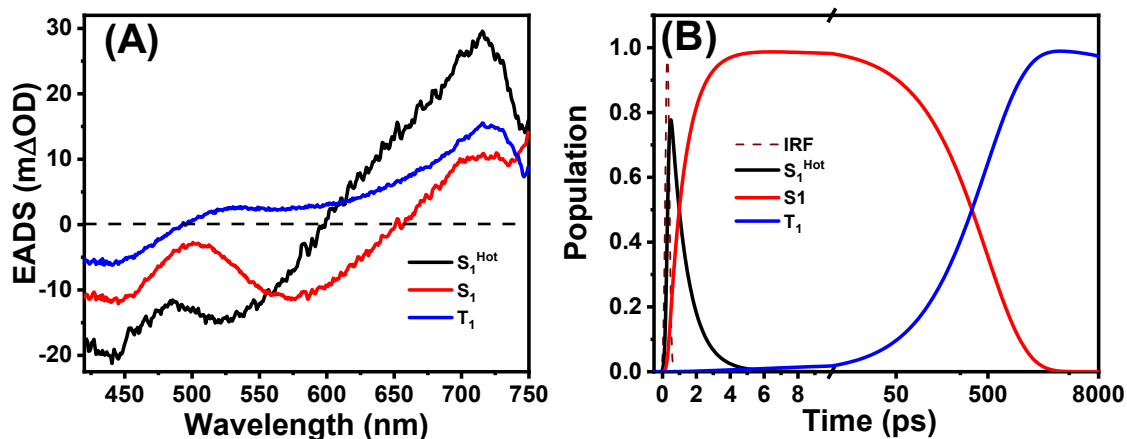

**Fig. S4:** Obtained evolution-associated difference spectra (EADS) of the corresponding states of P3HT in THF after exciting at 400 nm.

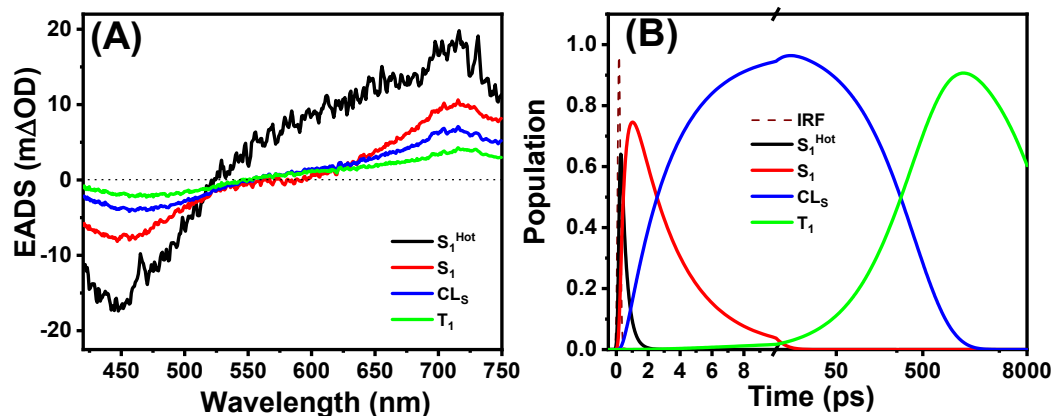

**Fig. S5:** Obtained evolution-associated difference spectra (EADS) of the corresponding states of P3HT PNP after exciting at 400 nm.

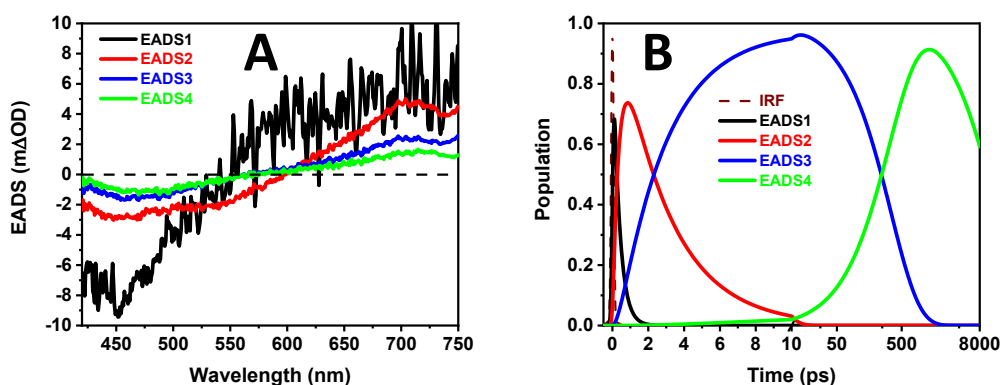

**Fig. S6:** Obtained evolution-associated difference spectra (EADS) of the corresponding states of P3HT/Au heterostructure after exciting at 400 nm.

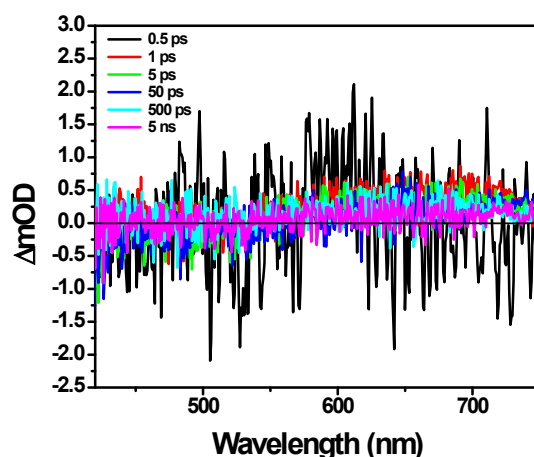

**Fig. S7:** TAS signal for 5 nM Au NP excited at 400 nm.

### Estimated rate constants from target analysis of P3HT/Au heterostructure

The rate constant obtained for conversion of SADS 1 to SADS 2 is  $6.849 \text{ ps}^{-1}$ . This rate constant is summation of two processes: (process a) conversion from  $S_1^{\text{Hot}}$  state to the  $S_1$  state [corresponding rate constant  $k_a$ ] and (process c) the electron transfer process from the  $S_1^{\text{Hot}}$  state to Au NPs [corresponding rate constant  $k_c$ ]. The value of  $K_a$  is  $2.898 \text{ ps}^{-1}$  (obtained from Fig. 4A) and the rate constant ( $k_c$ ) for electron transfer from  $S_1^{\text{Hot}}$  state of PNPs to Au NPs is  $3.951 \text{ ps}^{-1}$  and the timescale associated with the process ( $\tau_c = k_c^{-1}$ ) is 253 fs. The SADS 2 decays to ground state and SADS 3 simultaneously. The decay time of SADS 2 to ground state is 9.6 ps and the rate constant for conversion of SADS 2 to SADS 3 is  $0.3125 \text{ ps}^{-1}$ . This rate constant is also summation of two processes: (process b) population conversion from  $S_1$  of PNP to  $CL_S$  state [corresponding rate constant  $k_b$ ] and (process d) the electron transfer from  $CL_S$  state of the PNPs to the Au NPs [corresponding rate constant  $k_d$ ]. The value of the rate constant  $k_d$  is found to be  $0.0265 \text{ ps}^{-1}$  and therefore the timescale associated to the electron transfer from  $CL_S$  state of the PNPs to the Au NPs is  $37.7 \text{ ps}^{-1}$ .
